# Supplementary material for: Design and synthesis of conjugated polymers containing Pt(ii) complexes in the side-chain and their application in polymer memory devices
Source: Royal Society of Chemistry journal article supplement (doi:10.1039/c2jm16287c), 2012-01-01
Supplement: c2jm16287c.pdf [file c2jm16287c.pdf]

## Electronic Supplementary Information (ESI):

# Design and Synthesis of Conjugated Polymers Containing Pt(II) Complexes in the Side-chain and Their Application in Polymer Memory Devices

Peng Wang,<sup>a</sup> Shu-Juan Liu,<sup>\*a</sup> Zhen-Hua Lin,<sup>b</sup> Xiao-Chen Dong,<sup>a</sup> Qiang Zhao,<sup>\*a</sup>  
Wen-Peng Lin,<sup>a</sup> Ming-Dong Yi,<sup>a</sup> Shang-Hui Ye,<sup>a</sup> Chun-Xiang Zhu<sup>b</sup> and Wei Huang<sup>\*a</sup>

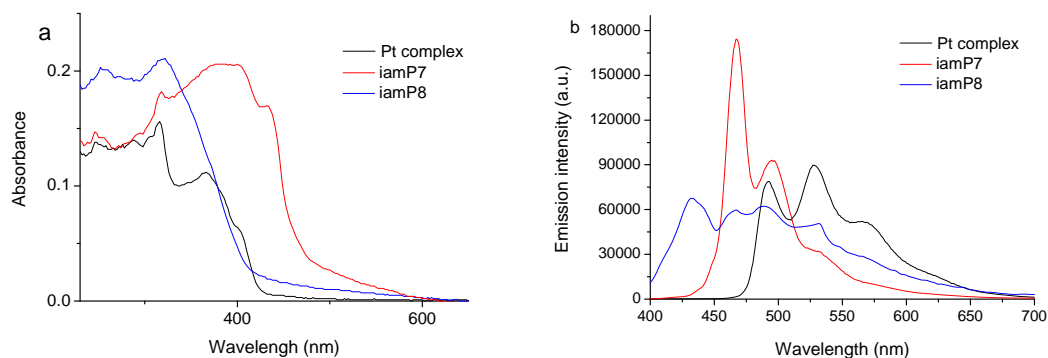

**Fig. S1** UV-vis absorption (a) and fluorescence (b) spectra of Pt complex **M6**, **iamP7** and **iamP8**.

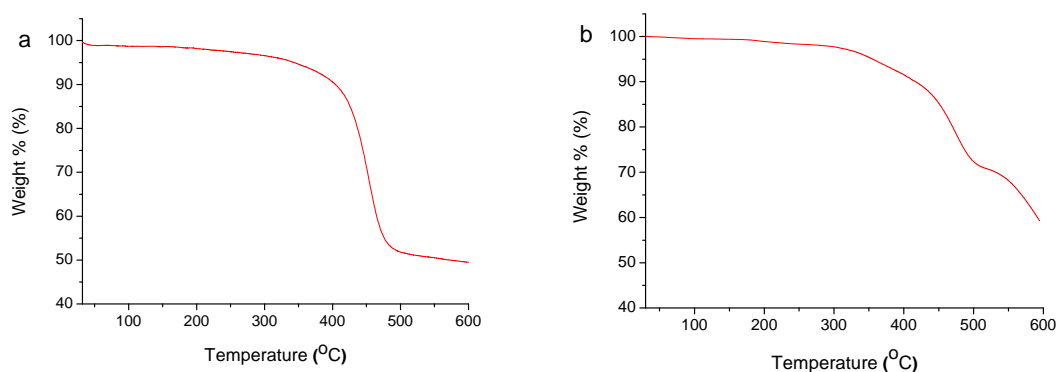

**Fig. S2** The TGA of **iamP7** (a) and **iamP8** (b).

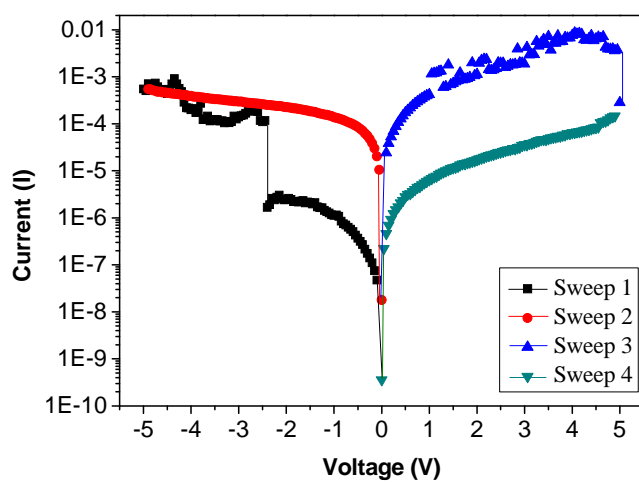

**Fig. S3** Typical I–V characteristics of the ITO/**iamP7** (30 nm)/Al device.
